# Supplementary material for: Solar-driven photoelectrocatalytic degradation of anticancer drugs using TiO2nanotubes decorated with SnS quantum dots
Source: Royal Society of Chemistry journal article supplement (doi:10.1039/d2dt00407k), 2022-01-01
Supplement: d2dt00407k1.pdf [file d2dt00407k1.pdf]

## Appendix A. Supplementary data

Solar-driven photoelectrocatalytic degradation of anticancer drugs using TiO<sub>2</sub> nanotubes decorated of SnS quantum dots

*Paweł Mazierski<sup>a</sup>, Patrycja Wilczewska<sup>a</sup>, Wojciech Lisowski<sup>c</sup>, Tomasz Klimczuk<sup>d</sup>, Anna Białk-Bielińska<sup>b</sup>, Adriana Zaleska-Medynska<sup>a</sup>, Ewa Siedlecka<sup>a</sup>, Aleksandra Pieczyńska<sup>a\*</sup>*

<sup>a</sup> Department of Environmental Technology, Faculty of Chemistry, University of Gdansk, 80-308 Gdansk, Poland

<sup>b</sup> Department of Environmental Analysis, Faculty of Chemistry, University of Gdansk, 80-308 Gdansk, Poland

<sup>c</sup> Institute of Physical Chemistry, Polish Academy of Science, Kasprzaka 44/52, 01-244 Warsaw, Poland

<sup>d</sup> Department of Solid State Physics, Gdansk University of Technology, 80-233 Gdansk, Poland

**Table S1.** Elemental composition (in atomic %) in the surface layer of SnS-modified TiO<sub>2</sub> NTs, evaluated by XPS analysis.

| Sample label               | Elemental composition (atomic %.) |       |       |       |       |      |       | O/Ti | Sn/S | (Sn+S)/(Ti+O) | S*/Ti | (SnS/TiO <sub>2</sub> )** |
|----------------------------|-----------------------------------|-------|-------|-------|-------|------|-------|------|------|---------------|-------|---------------------------|
|                            | Ti                                | O     | Sn    | S     | C     | N    | Cl    |      |      |               |       |                           |
| IISnS-Ti/TiO <sub>2</sub>  | 20.38                             | 59.57 | 3.99  | 2.60  | 12.57 | 0.77 | 0.12  | 2.92 | 1.53 | 0.082         | 0.106 | 0.071                     |
| IIISnS-Ti/TiO <sub>2</sub> | 21.16                             | 59.03 | 3.28  | 1.83  | 13.37 | 1.14 | 0.19  | 2.79 | 1.79 | 0.064         | 0.068 | 0.045                     |
| IVSnS-Ti/TiO <sub>2</sub>  | 17.40                             | 54.01 | 8.42  | 6.66  | 12.70 | 0.70 | 0.11  | 3.10 | 1.26 | 0.211         | 0.360 | 0.240                     |
| VISnS-Ti/TiO <sub>2</sub>  | 14.08                             | 49.79 | 13.54 | 12.22 | 9.71  | 0.50 | 0.16  | 3.54 | 1.11 | 0.403         | 0.832 | 0.555                     |
| XSnS-Ti/TiO <sub>2</sub>   | 7.83                              | 38.41 | 18.28 | 17.86 | 17.23 | 0.39 | <0.05 | 4.91 | 1.02 | 0.782         | 2.231 | 1.487                     |
| Ti/TiO <sub>2</sub>        | 22.81                             | 59.01 | -     | 0     | 18.18 | 0    | 0     | 2.59 | -    | -             | -     | -                         |

S\* - SnS fraction of sulfur (see SnS fraction of S 2p<sub>3/2</sub> in Table S2)

\*\*assuming atomic ratio Sn:S = 1:1 for SnS and Ti:O = 1:2 for TiO<sub>2</sub> we can roughly estimate SnS/TiO<sub>2</sub> to be 2S\*/3Ti

**Table S2.** Chemical character of Sn and S components in the surface layer of SnS-Ti/TiO<sub>2</sub> nanocomposites, evaluated through deconvolution of Sn 3d and S 2p high resolution XPS spectra.

| Sample label               | Sn 3d <sub>5/2</sub> fraction ( atomic %) |                                      | S 2p <sub>3/2</sub> fraction ( atomic %) |                   |
|----------------------------|-------------------------------------------|--------------------------------------|------------------------------------------|-------------------|
|                            | SnS, SnO                                  | SnSO <sub>4</sub> , SnO <sub>2</sub> | SnS                                      | SnSO <sub>4</sub> |
|                            | 485.0- 485.6 eV                           | 486.4-486.8 eV                       | 160.8-161.5 eV                           | 168.4-169.4 eV    |
| IISnS-Ti/TiO <sub>2</sub>  | 11.4                                      | 88.6                                 | 83.3                                     | 16.7              |
| IIISnS-Ti/TiO <sub>2</sub> | 14.2                                      | 85.8                                 | 79.2                                     | 20.8              |
| IVSnS-Ti/TiO <sub>2</sub>  | 19.6                                      | 80.4                                 | 94.0                                     | 6.0               |
| VISnS-Ti/TiO <sub>2</sub>  | 30.1                                      | 69.9                                 | 95.9                                     | 4.1               |
| XSnS-Ti/TiO <sub>2</sub>   | 20.6                                      | 79.4                                 | 97.8                                     | 2.2               |

**Table S3.** The first rate constant  $k$  for anticancer drugs photoelectrocatalytic (PEC), photocatalytic (PC) and electrochemical (E) decomposition, total organic carbon removal ( $\Delta$ TOC), mineralization current efficiency (MCE) and consumed electrical energy ( $E_{EO}$ )

| Photoelectrode             | Compound | Process     | $k$ (min <sup>-1</sup> ) | $R^2$  | $\Delta$ TOC (%) | MCE (%) | $E_{EO}$ (kWh m <sup>-3</sup> order <sup>-1</sup> ) |
|----------------------------|----------|-------------|--------------------------|--------|------------------|---------|-----------------------------------------------------|
| Ti/TiO <sub>2</sub>        | IF       | PEC         | 0.0072                   | 0.9827 | 37 ±1.5          | 89      | 13.7                                                |
| IIISnS-Ti/TiO <sub>2</sub> | IF       | PEC         | 0.0149                   | 0.9846 | 27 ±2.1          | 62      | 5.44                                                |
| IIISnS-Ti/TiO <sub>2</sub> | IF       | PEC         | 0.0153                   | 0.9449 | 27 ±3.0          | 62      | 5.63                                                |
| IVSnS-Ti/TiO <sub>2</sub>  | IF       | PEC         | 0.017                    | 0.9822 | 27 ±1.8          | 62      | 5.73                                                |
| VISnS-Ti/TiO <sub>2</sub>  | IF       | PEC         | 0.0178                   | 0.9827 | 56 ±4.5          | 129     | 6.63                                                |
| XSnS-Ti/TiO <sub>2</sub>   | IF       | PEC         | 0.0139                   | 0.9815 | 1 ±0.3           | 2.3     | 7.84                                                |
| VISnS-Ti/TiO <sub>2</sub>  | IF       | PC          | 0.0085                   | 0.9825 | 6.5 ±0.5         | 12      | 12.1                                                |
| VISnS-Ti/TiO <sub>2</sub>  | IF       | E           | -                        | -      | 0                | -       | -                                                   |
| Ti/TiO <sub>2</sub>        | 5-FU     | PEC         | 0.0104                   | 0.9959 | 14 ±0.4          | 14.5    | 9.58                                                |
| VISnS-Ti/TiO <sub>2</sub>  | 5-FU     | PEC         | 0.0169                   | 0.9982 | 46 ±3.6          | 47.1    | 6.34                                                |
| VISnS-Ti/TiO <sub>2</sub>  | 5-FU     | PC          | 0.0063                   | 0.9849 | 0                | -       | 13.3                                                |
| VISnS-Ti/TiO <sub>2</sub>  | 5-FU     | E           | -                        | -      | 0                | -       | -                                                   |
| Ti/TiO <sub>2</sub>        | IMB      | PEC         | 0.0084                   | 0.9779 | 3 ±0.2           | 1.2     | 9.54                                                |
| VISnS-Ti/TiO <sub>2</sub>  | IMB      | PEC         | 0.0149                   | 0.9885 | 15 ±1.5          | 47.5    | 6.66                                                |
| VISnS-Ti/TiO <sub>2</sub>  | IMB      | PC          | 0.0066                   | 0.9957 | 0                | -       | 16.7                                                |
| VISnS-Ti/TiO <sub>2</sub>  | IMB      | E           | -                        | -      | 0                | -       | -                                                   |
| VISnS-Ti/TiO <sub>2</sub>  | IF       | PEC (0.5 V) | 0.0123                   | 0.9787 | 15 ±1.1          | 36      | 8.17                                                |
| VISnS-Ti/TiO <sub>2</sub>  | IF       | PEC (1.5 V) | 0.0107                   | 0.9777 | 0                | -       | 9.42                                                |

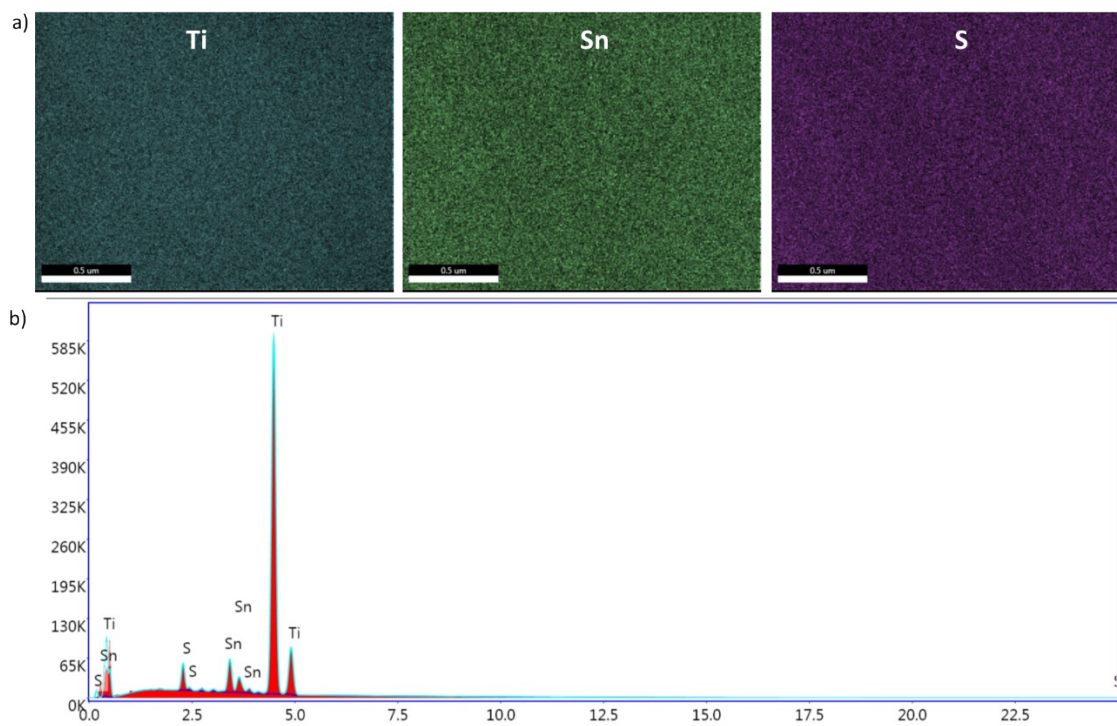

**Fig. S1.** The EDS (a) mapping and (b) spectrum of VISnS-Ti/TiO<sub>2</sub> photoelectrodes.

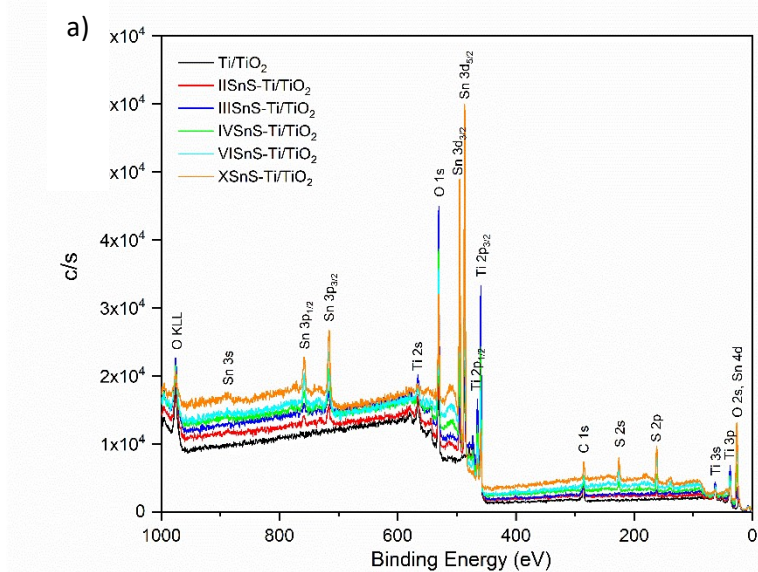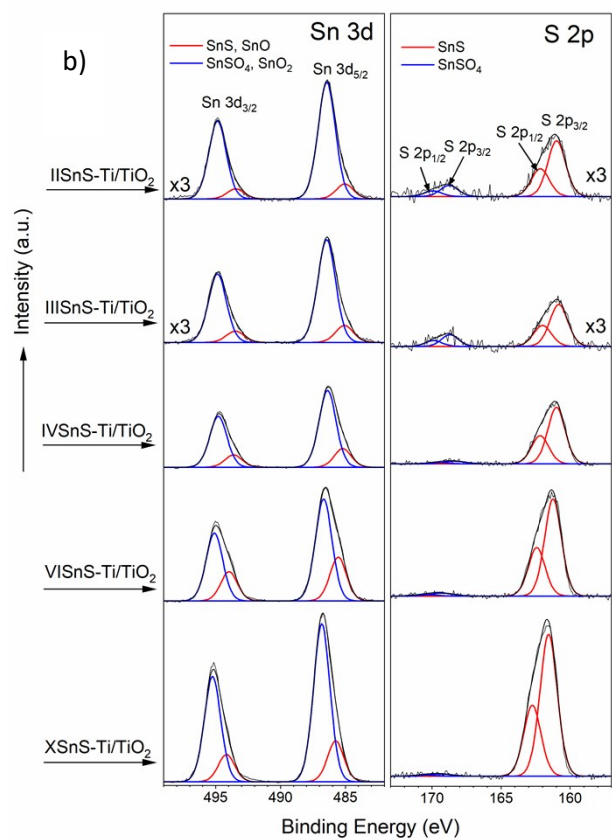

**Fig. S2.** The survey spectra a) and high resolution Sn3d and S2p XPS spectra b) recorded on SnS-Ti/TiO<sub>2</sub> nanocomposites prepared using 2, 3, 4, 6 and 10 SILAR cycles.

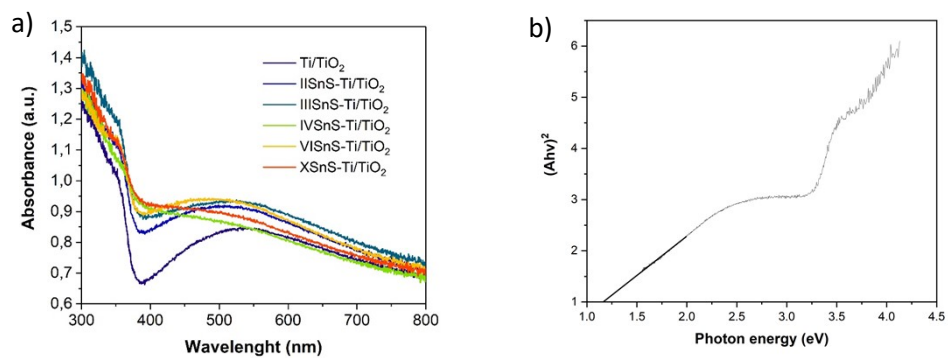

**Fig. S3.** UV-Vis spectra of the Ti/TiO<sub>2</sub> and SnS-Ti/TiO<sub>2</sub> photoelectrodes (a) and Tauc plot of VISnS-Ti/TiO<sub>2</sub> photoelectrode (b).

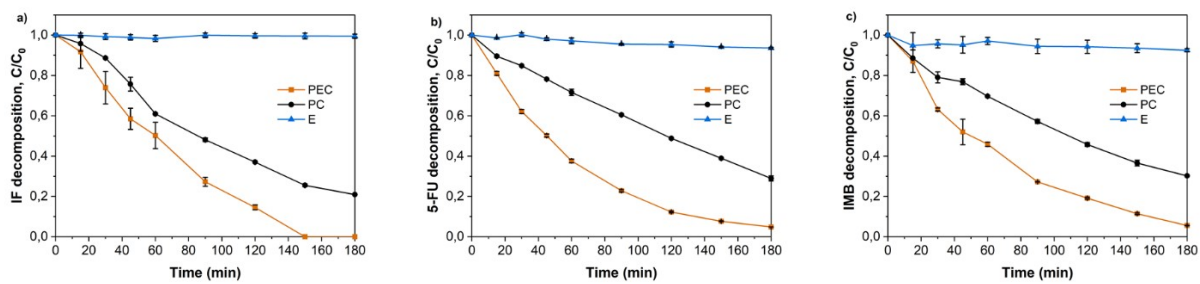

**Fig. S4.** Photoelectrocatalytic (PEC), photocatalytic (PC) and electrochemical (E) decomposition of IF a), 5-FU b) and IMB c).



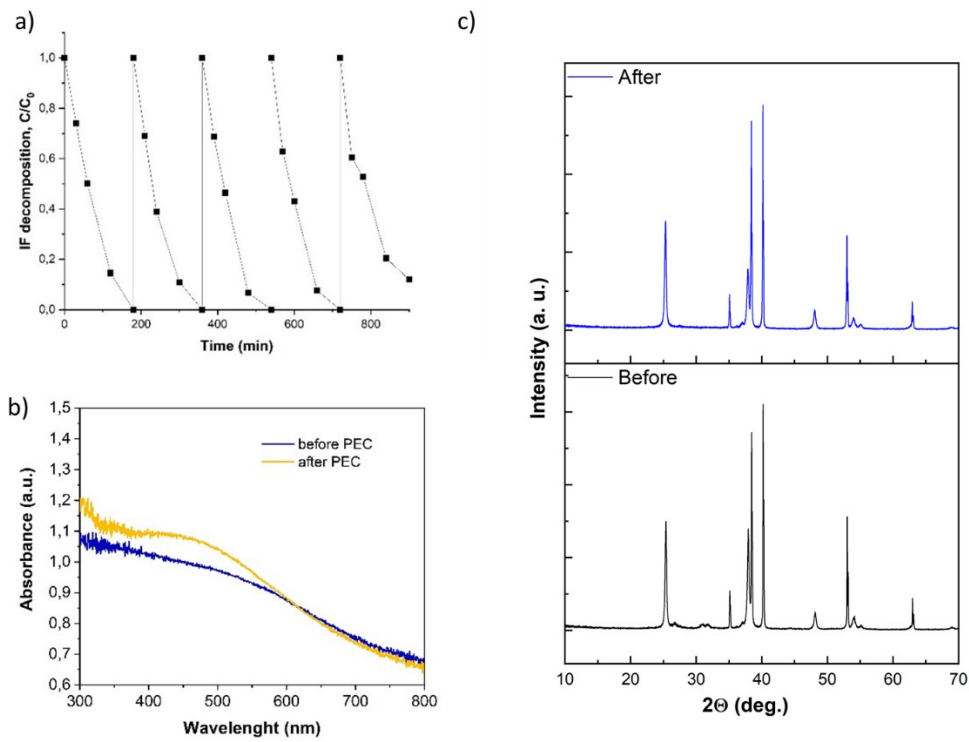

**Fig. S5.** The recycled PEC degradation of IF for VISnS/Ti/TiO<sub>2</sub> (a) and DRS UV-Vis (b) and XRD (c) analysis of photoelectrode SnS-Ti/TiO<sub>2</sub> before and after stability test

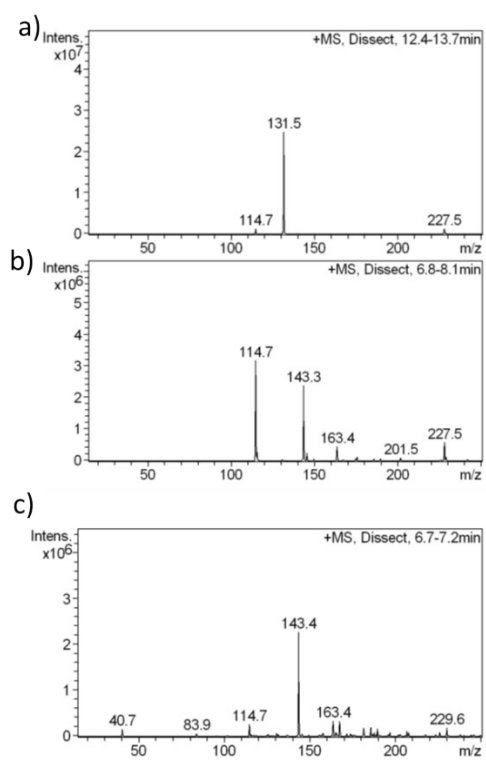

**Fig. S6.** MS spectra of 5-FU (a) and degradation products with  $[M+H]^+=163$  (b) and  $[M+H]^+=143$  (c).

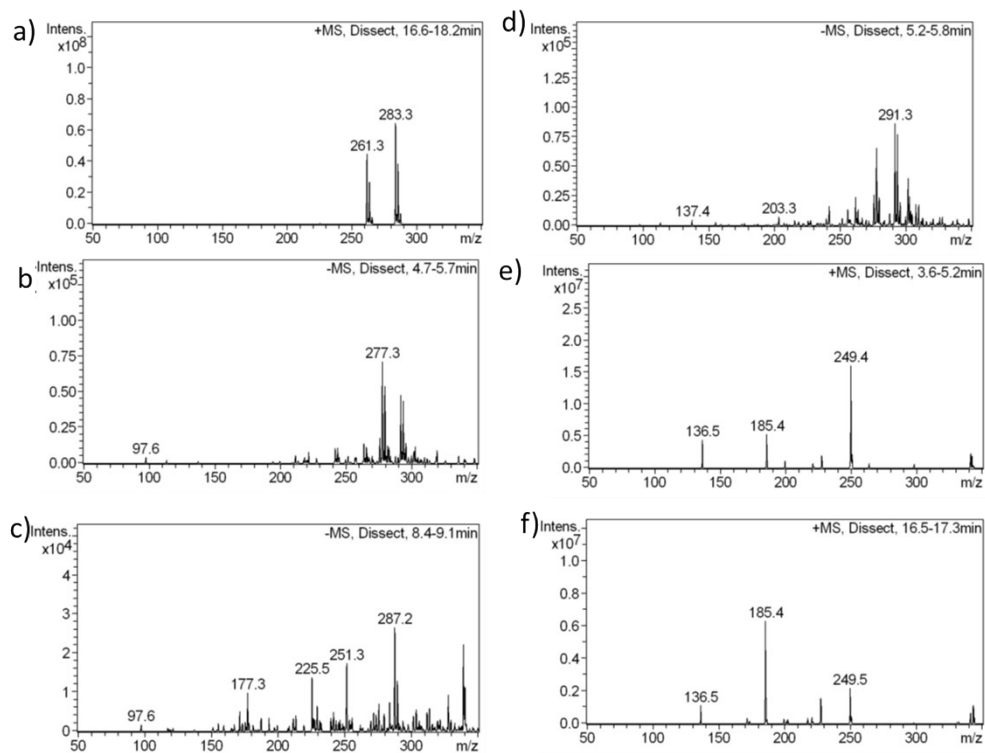

**Fig. S7.** MS spectra of IF (a) and degradation products with  $[M-H]^- = 277$  (b),  $[M-H]^- = 287$  (c),  $[M-H]^- = 291$  (d),  $[M+H]^+ = 249$  (e) and  $[M+H]^+ = 185$  (f).

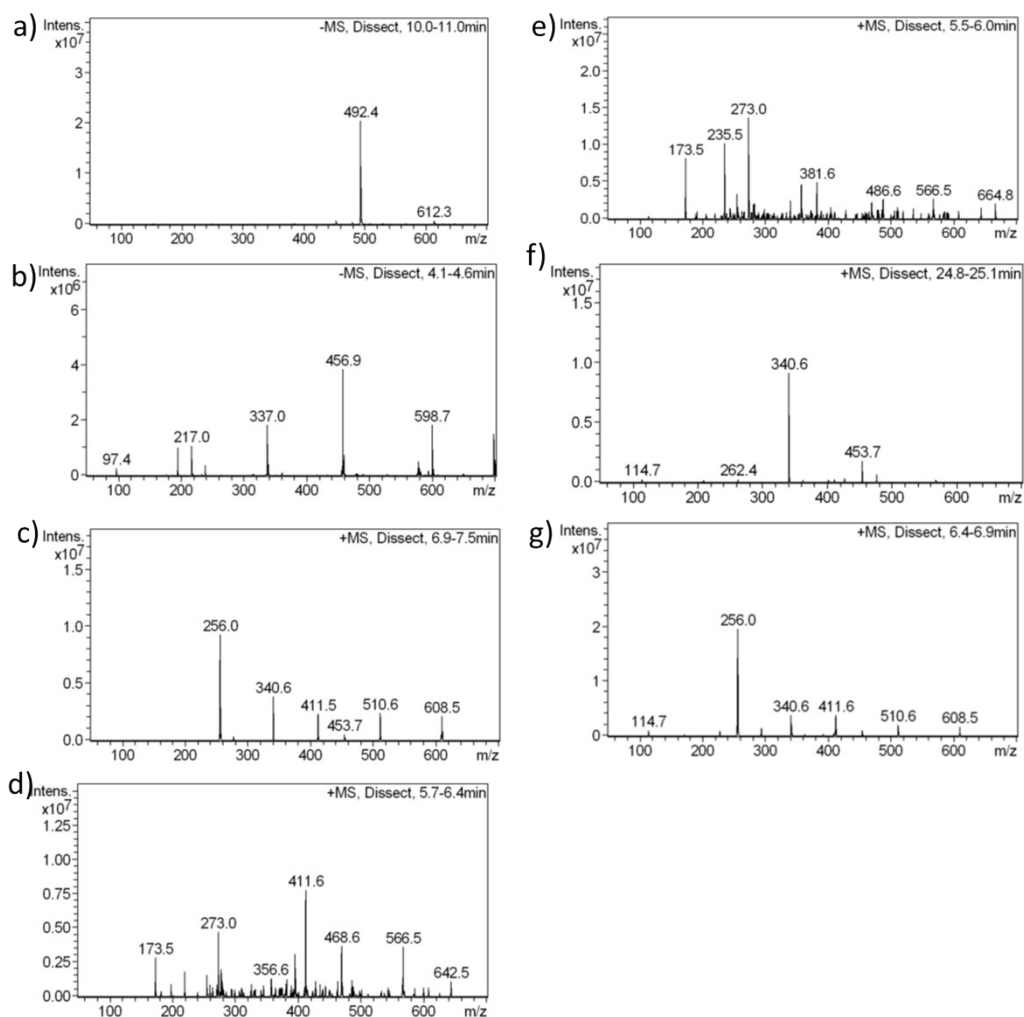

**Fig. S8.** MS spectra of IMB (a) and degradation products with  $[M-H]^- = 337$  (b),  $[M+H]^+ = 510$  (c),  $[M+H]^+ = 411$  (d),  $[M+H]^+ = 273$  (e),  $[M+H]^+ = 262$  (f) and  $[M+H]^+ = 256$  (g).
